# Supplementary material
Source: PubMed Central journal article supplement (PMC2049063)

**ARHGEF1 IS REQUIRED BY T CELLS FOR THE DEVELOPMENT OF  
AIRWAY HYPERREACTIVITY AND INFLAMMATION**

Jeanette P. Brown, Christian Taube, Nobuaki Miyahara, Toshiyuki Koya, Roberta  
Pelanda, Erwin W. Gelfand, and Raul M. Torres

**Online Data Supplement**

**Figure E1:**

*Arhgef1*-deficient dendritic cells are competent to facilitate AHR and airway inflammation. A) Lung resistance (RL) after transfer of OVA-pulsed bone marrow-derived wild type dendritic cells (filled circles) or *Arhgef1*<sup>-/-</sup> dendritic cells (open circles) or un-pulsed bone marrow-derived *Arhgef1*<sup>-/-</sup> dendritic cells (filled squares) into wild type mice in response to increasing concentrations of methacholine (MCh) after airway OVA challenge. Symbols represent the geometric mean and error bars show SEM. For each cohort n = 4. B) Leukocyte numbers from BAL of from wild type (filled bars) or *Arhgef1*<sup>-/-</sup> (open bars) dendritic cells or un-pulsed bone marrow-derived *Arhgef1*<sup>-/-</sup> dendritic cells (gray bars) transferred into wild type mice after airway OVA challenge.

Supplementary Figure 1

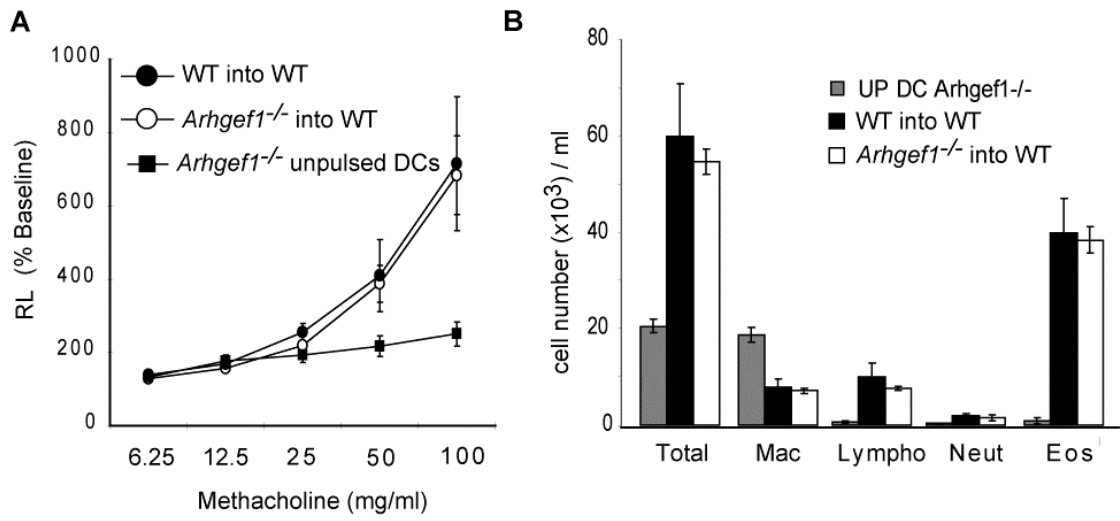

Supplement: ajrccm_176_1_10__1.pdf [file ajrccm_176_1_10__1.pdf]
